# Supplementary material
Source: PubMed Central journal article supplement (PMC7960481)
Supplement: 15-01302.pdf [file 15-01302.pdf]

**On-line Table 1: Baseline characteristics of all patients<sup>a</sup>**

|                                  | Group A    | Group B    | P Value |
|----------------------------------|------------|------------|---------|
| Clinical data                    |            |            |         |
| Age (yr)                         | 51 ± 14    | 55 ± 14    | .024    |
| Sex (male)                       | 50 (49.0%) | 47 (46.1%) | .674    |
| Hypertension                     | 33 (32.4%) | 45 (44.1%) | .084    |
| Smoking                          | 19 (18.6%) | 18 (17.6%) | .856    |
| History of intracranial aneurysm | 3 (2.9%)   | 4 (3.9%)   | 1.000   |
| Diabetes                         | 3 (2.9%)   | 8 (7.8%)   | .214    |
| DSA                              |            |            |         |
| Intracranial aneurysm            | 62 (60.8%) | 59 (57.8%) | .669    |
| Moyamoya disease                 | 3 (2.9%)   | 1 (1.0%)   | .621    |
| Arteriovenous malformation       | 3 (2.9%)   | 5 (4.9%)   | .721    |
| Outcome (aneurysm)               |            |            |         |
| Coiling                          | 52 (83.9%) | 49 (83.1%) | .903    |
| Clipping                         | 6 (5.9%)   | 7 (6.9%)   | .698    |

<sup>a</sup>Data indicate mean ± SD (age), or numbers of patients with proportions in parentheses (other baseline characteristics).

**On-line Table 2: Objective image-quality measurements in the 2 groups**

| Groups  | ICA              |        |        | MCA              |        |        | Parenchyma    |            |
|---------|------------------|--------|--------|------------------|--------|--------|---------------|------------|
|         | Attenuation (HU) | SNR    | CNR    | Attenuation (HU) | SNR    | CNR    | CT Value (HU) | Noise (HU) |
| Group A | 388 ± 76         | 24 ± 5 | 22 ± 5 | 336 ± 69         | 20 ± 4 | 18 ± 4 | 34 ± 4        | 17 ± 2     |
| Group B | 272 ± 51         | 34 ± 7 | 30 ± 6 | 228 ± 47         | 29 ± 6 | 25 ± 5 | 30 ± 3        | 8 ± 1      |
| P value | <.001            | <.001  | <.001  | <.001            | <.001  | <.01   | <.001         | <.001      |

**On-line Table 3: Detection of intracranial aneurysms in 2 groups by DSA**

|                            | No. of Patients            |                            |
|----------------------------|----------------------------|----------------------------|
|                            | Group A (No.) <sup>a</sup> | Group B (No.) <sup>a</sup> |
| Aneurysms                  | 62 (87)                    | 59 (70)                    |
| Single                     | 48                         | 51                         |
| Multiple                   | 14 (39)                    | 8 (19)                     |
| No aneurysms               | 40                         | 43                         |
| Moyamoya disease           | 3 (3)                      | 1 (1)                      |
| Arteriovenous malformation | 3 (3)                      | 5 (5)                      |

<sup>a</sup>"No." indicates the numbers of aneurysms.

**On-line Table 5: Radiation dose comparison between the 2 groups**

| Radiation Dose Descriptor | Group A     | Group B    | P Value |
|---------------------------|-------------|------------|---------|
| CTDI <sub>vol</sub> (mGy) | 7.0 ± 0.4   | 25.9 ± 2.0 | <.001   |
| DLP (mGy × cm)            | 136.7 ± 8.8 | 507 ± 44.7 | <.001   |
| ED (mSv)                  | 0.3 ± 0.0   | 1.1 ± 0.1  | <.001   |

**Note:**—CTDI<sub>vol</sub> indicates volume CT dose index.

<sup>a</sup>Data represent mean ± SD.

**On-line Table 4: Number and location of detected intracranial aneurysms at DSA and CTA**

| Location                             | Group A |                      | Group B |                      |
|--------------------------------------|---------|----------------------|---------|----------------------|
|                                      | DSA     | CTA <sup>(a,b)</sup> | DSA     | CTA <sup>(a,b)</sup> |
| Anterior communicating artery        | 18      | 19 (1, 0)            | 15      | 16 (1, 0)            |
| Anterior cerebral artery             | 6       | 3 (0, 3)             | 1       | 1 (0, 0)             |
| Middle cerebral artery               | 14      | 12 (0, 2)            | 1       | 2 (1, 0)             |
| Internal carotid artery              | 20      | 17 (0, 3)            | 13      | 11 (0, 2)            |
| Vertebral and basilar arteries       | 4       | 4 (0, 0)             | 4       | 4 (0, 0)             |
| Posterior communicating artery       | 17      | 19 (2, 0)            | 30      | 29 (1, 2)            |
| Posterior cerebral artery            | 4       | 3 (0, 1)             | 3       | 3 (0, 0)             |
| Anterior superior cerebellar artery  | 0       | 0 (0, 0)             | 2       | 2 (0, 0)             |
| Posterior inferior cerebellar artery | 4       | 3 (0, 1)             | 1       | 1 (0, 0)             |

<sup>a</sup>False-positive result.

<sup>b</sup>False-negative result.
